# Supplementary material for: Identification of Epstein-Barr Virus Replication Proteins in Burkitt’s Lymphoma Cells
Source: Pathogens. 2015 Oct 30;4(4):739–51. doi: 10.3390/pathogens4040739 (PMC4693162; doi:10.3390/pathogens4040739)
Supplement: Supplementary file 1 [file pathogens-04-00739-s001.xlsx]

## Sheet: supp table 1
Identification of Epstein-Barr virus replication proteins in Burkitt’s lymphoma cells.
Supplementary Table 1. Peptides identified by first mass spectrometryuniprot search that match EBV proteins. NaN = not detected in control cells
protein	Peptide sequence	PEP	Score	MS/MS Count	Ratio H/L normalized
BALF2	CMHEALYTGLAQALR	0.000953	105.65	9	NaN
BALF2	GHYQTLCTNFR	0.000605	113.67	7	65.943
BALF2	RENYIINGPYMK	0.000346	142.97	2	NaN
BALF2	RPDPNCGLLR	0.000304	128.03	14	NaN
BALF2	DDAEYLLGR	7.81e-05	143.37	3	75.802
BALF2	AGLEAIISQK	3.11e-05	136.49	7	11.241
BALF2	QFYNSDLSR	1.42e-05	163.88	8	64.733
BALF2	ARPVVTLPVTINK	5.18e-06	134.06	5	237.04
BALF2	LSSLYLWHNFSR	5.71e-07	164.13	10	NaN
BALF2	ENYIINGPYMK	2.2e-07	149.94	2	17.177
BALF2	FVFATPTLGLTVK	6.75e-09	151.16	4	42.916
BALF2	VPLYDKEVFPEGVPQLR	2.54e-10	165.66	7	NaN
BALF2	YAYYLQFCQGQK	2.92e-11	166.86	6	42.468
BALF2	APAVCLNTLFFR	1.87e-11	173.04	5	63.727
BALF2	SSLTPVPETGSYVAGAAASPMCSLCEGR	7.89e-13	140.4	6	NaN
BALF2	LYSGNLVAIPSLK	4.35e-13	163.33	5	33.426
BALF2	QEVAVGQSASVR	3.49e-14	198.37	11	70.032
BALF2	EVATLGTGYAGHR	1.3e-16	206.36	4	NaN
BALF2	EVFGYDAYSALPR	3.25e-19	188.09	7	70.372
BALF2	YTGVNGNNQIFQAGNLGYFMGR	9.23e-20	174.72	13	NaN
BALF2	VVHGEPTCDLPDLDAALQGR	3.46e-23	201.22	8	59.252
BALF2	DVDAAVDAEVVQFMNSMAK	4.11e-27	208.4	4	NaN
BALF2	VVFTGENAALQNSFIK	5.15e-30	219.53	8	40.652
BALF2	AHEESNVIDVVPGNLVTYAK	4.35e-31	225.39	8	40.887
BALF2	TQAATTYEIENIR	1.13e-31	233.52	11	61.765
BALF2	RTQAATTYEIENIR	6.23e-32	233.62	2	NaN
BALF2	YTYWQLNQNLLER	1.58e-44	271.04	7	62.582
BALF4	FSSDIQCPSFGTR	7.24e-05	134.4	2	NaN
BALF4	EYNFQAQNIAGLR	1.19e-16	206.74	2	NaN
BALF4	VCELSSHGDLFR	3.34e-08	166.04	2	NaN
BALF5	VFSCLLAAAQK	0.000534	122.69	2	NaN
BALF5	FAEALAAHTTR	0.000232	134.98	7	NaN
BALF5	CFQTPGAAGVVDVR	6.19e-05	128.06	3	NaN
BALF5	VIYGDTDSLFIECR	1.5e-08	165.51	1	NaN
BALF5	SGGLFYNPFLRPNK	1.47e-10	168.98	4	NaN
BaRF1	DHEGFACLTVETHR	0.000692	105.66	2	NaN
BaRF1	TAVEVETAFIEAR	0.000261	120.6	2	NaN
BaRF1	ATWIQELFR	1.32e-05	160.75	6	NaN
BaRF1	AASLLYNSMTAK	2.21e-06	158.34	7	NaN
BaRF1	AAMNAYAEAIMADEALQAK	1.68e-07	138.82	7	NaN
BaRF1	GLMPGICLANNYISR	1.95e-08	145.43	4	NaN
BaRF1	ILGDIGQAPLYGTPPPK	3.68e-09	149.19	3	NaN
BaRF1	GEGVTLVDVR	2.82e-09	181.87	6	36.874
BBLF2-BBLF3	SIYASCYANHR	6.62e-06	155.26	4	NaN
BBLF2-BBLF3	EGGEGGGEDETTVVGR	5.07e-06	127.57	4	NaN
BBLF2-BBLF3	VSSVTFYNVTQTAGR	3.65e-35	236.03	1	NaN
BBLF3	GDVFTYSTETPDDPSPVPFR	4.48e-31	225.17	1	NaN
BBLF4	ECDNILTFLVGNPR	0.000537	115.06	1	NaN
BBRF2	CNNLDSLFLYNGAR	3.07e-07	153	1	NaN
BcLF1	LMVGNLPTPLAPAAFQEAR	0.000196	105.38	3	NaN
BcLF1	AENMGSGFSQYVR	7.28e-05	134.4	3	NaN
BcLF1	SDLPAVAAGVEDQPR	1.05e-05	122.12	1	NaN
BcLF1	LGNHAVAVESLQK	3.45e-06	133.16	3	43.915
BcLF1	MLDNPTQQLPVEAWIVNK	2.36e-07	132.9	1	NaN
BcLF1	GLINTVLSVK	2.59e-08	164.33	3	31.308
BcLF1	LSEMVAAVSGESVLK	3.23e-09	162.7	2	NaN
BcLF1	DLSASFMTCPTFTR	7.99e-11	168	1	NaN
BcLF1	DEDILDNLENGTLR	6.74e-11	171.11	2	50.288
BcLF1	MYNDTQSPYPLNR	5.95e-16	190.57	4	NaN
BcLF1	GGEPVGGVFIVTDNVLR	5e-19	189.81	2	NaN
BcLF1	TVASALQFGVDALER	2.35e-35	242.93	5	NaN
BcLF1	VSVDNDVTQQLAPNPADKR	6.41e-41	254.02	4	NaN
BcLF1	GENLVTAVSYGR	0.000335	119.96	2	52.016
BDLF1	ILLFNVYSR	0.000153	142.98	2	52.121
BDLF1	IDLDDLSVADDLSR	2.15e-07	156.96	8	78.157
BdRF2	DPEEDEEGGGLFPGEDATLYR	3.19e-57	262.58	3	NaN
BFLF1	SILTGQSPANFCFK	0.000251	119.17	2	NaN
BFLF1	SLILDSFGNNIK	5.92e-06	145.14	1	NaN
BFLF2	AVNVDEDAIYEAIK	3.44e-06	130.29	1	39.716
BFLF2	TFYVSLLSSSPSAVK	1.39e-08	151.38	2	NaN
BFRF1	SPLVFPAELDLLK	0.000184	106.54	6	27.133
BFRF1	NSIIMLGQDDFIK	1.03e-10	175.6	9	NaN
BFRF1	VMDMISDMSQQLSR	7.81e-11	172.09	3	NaN
BFRF1	SGQSGPCLGLSTDVDLPK	3.13e-11	154.75	5	24.496
BFRF1	NCNYPSSPVFVISNNGLATTLR	3.2e-36	224.38	2	NaN
BFRF1	TTMQFLVFQAANAQK	1.89e-37	255.28	9	34.491
BFRF3	AATSGATAAASAAAAVDTGSGGGGQPQDTAPR	1.61e-28	178.23	2	NaN
BFRF3	LEADFPDSPLLPK	0.000664	116.51	1	NaN
BFRF3	FQELNQNNLPNDVFR	3.45e-20	189.59	4	42.373
BGLF2	TVEELQDITPSEIIPLGR	6.07e-07	129.89	3	NaN
BGLF4	GAGHIPDPSACGPVGAQTALR	4.96e-06	113.05	2	NaN
BGLF4	CDHLPITCEYLLGR	2.8e-06	143.25	4	NaN
BGLF4	SDPLYFLQFAAPK	5.89e-07	153.75	7	NaN
BGLF4	SIYWGLQAATDEQR	7.17e-11	169.98	1	NaN
BGLF4	LVLTDYGTASLHDR	8.84e-24	225.79	3	NaN
BGLF4	GSYGAVYAHADNATVK	3.2e-26	215.93	6	46.956
BGLF4	VTNIDDMTETLYVK	2.83e-43	274.38	3	42.895
BGLF5	VNIVTAFFR	0.000855	128.35	2	NaN
BGLF5	LICGDASANR	0.000795	117.52	4	NaN
BGLF5	SEFDPIYPSYTALYK	7.12e-06	129.17	3	NaN
BGLF5	GQSENLMWDILR	4.89e-06	148.89	3	NaN
BGLF5	LGPGHDLVADSLAANR	2.8e-06	134.88	1	NaN
BGLF5	VPVNIFINPR	1.14e-12	193.38	3	NaN
BHRF1	NSETFTETWNR	6.09e-06	156.14	5	NaN
BKRF3	TQATVYPEEDMCMAWAR	1.89e-09	159.04	1	NaN
BLLF3	PVTSHVGIIDPGYTGELR	4.05e-07	127.83	2	NaN
BLLF3	LLLQQASVGR	2.96e-09	187.16	5	NaN
BLRF2	AVDMSMEDMAAR	0.000763	105.65	1	NaN
BLRF2	GGACASSTSVPSAPVPPPEPLTAR	0.000507	88.329	1	NaN
BLRF2	NEMENILQNLTLR	9.99e-32	236.05	2	NaN
BMLF1	ELAPCFLPNTR	4.6e-05	141.89	4	47.065
BMLF1	QPLCLLAAYAAVAPAYINANCR	2.03e-06	116.61	2	NaN
BMLF1	SPLCRDEDEKEETGNSSYTR	1.79e-06	123.54	1	NaN
BMRF1	PETPSPAIPSHSSNTALER	0.000735	96.143	1	NaN
BMRF1	LTMEYDDKVSK	0.000234	140.45	2	NaN
BMRF1	VQPLGTGLQQRPR	0.000174	134.49	5	NaN
BMRF1	PLSVGPYEAFTGPVAK	0.000145	117.48	1	NaN
BMRF1	LRNEQMIGQVLLMPK	3.56e-05	120.29	1	NaN
BMRF1	METTQTLR	7.12e-06	155.58	3	NaN
BMRF1	SHHTCALMPYMPPASDR	2.99e-06	127.49	4	57.699
BMRF1	TPTWESPARPETPSPAIPSHSSNTALER	2.39e-08	118.52	1	NaN
BMRF1	CYDHAQTHLK	1.43e-12	188.91	9	NaN
BMRF1	NEQMIGQVLLMPK	4.66e-16	194.98	14	8.6584
BMRF1	ELFGSAVEQASLQFYK	6.26e-19	200.81	6	NaN
BMRF1	GGVLQVNLLSVNYGGPR	1.37e-21	187.56	17	14.29
BNRF1	LYELLSDPR	0.000777	129.85	1	NaN
BNRF1	VGEQGPDQMFEVQHGPETVLR	0.00065	92.679	1	NaN
BNRF1	ATVALINR	0.000426	131.03	1	NaN
BNRF1	ALLVAGPETADTRPDLR	0.000406	115.26	3	NaN
BNRF1	SPLILAPNASGMFESR	6.45e-06	123.14	1	NaN
BNRF1	PSTWSAEIQQFLR	2.52e-07	160.84	4	NaN
BNRF1	KYDSGQVAAGFQR	5.1e-16	195.72	2	NaN
BNRF1	ADNSAVMEAMTAASDYAR	4.08e-16	166.21	1	NaN
BNRF1	NPTEQGNIAGLCSR	1.97e-16	196.97	3	NaN
BNRF1	LFGQDGEANIQEQR	2.58e-23	211.82	3	NaN
BORF2	EALNLVGGR	0.000964	126.24	3	NaN
BORF2	ASTLANLLVR	0.000954	121.5	5	NaN
BORF2	IVSSGYLSALR	0.000436	126.66	5	NaN
BORF2	LAGFCASTTCLYAGLR	0.00011	118.52	2	NaN
BORF2	SPAEQMPPRPMEPAQVAGPVDIMSK	7.97e-05	89.392	1	NaN
BORF2	SLMFSIVNCAVK	2.25e-05	142.76	4	NaN
BORF2	DTPWSDWYLFDPK	3.34e-06	132.97	1	25.52
BORF2	DRAPFVDQSQSHSLFLR	1.97e-06	129.05	2	NaN
BORF2	FQTAFDYNQEDLIQMSR	1.43e-06	134.33	1	NaN
BORF2	YYDTYLYVGR	1.81e-07	160.75	4	28.375
BORF2	VSAFAQSPAYER	2.29e-08	159.66	5	29.081
BORF2	AGVGVGVTGAGQDGK	1.62e-08	148.85	7	44.656
BORF2	ADTQGDELLLALPR	1.77e-09	157.2	7	28.839
BORF2	AESVTHTVAEYLEVFSDK	4.84e-11	148.52	2	NaN
BORF2	SVATCNLANICLPR	1.26e-11	185.2	4	NaN
BORF2	ATTSHVEHELLSK	5.59e-12	187.62	6	35.409
BORF2	ANSDPEADVLAGR	2.56e-12	188.13	7	NaN
BORF2	GPGEGPGGWCVPGGLEVCYK	1.74e-18	188.09	2	NaN
BORF2	APFVDQSQSHSLFLR	4.46e-19	206.49	3	NaN
BORF2	QLFSEDDLLETDGFTER	5.71e-36	242.1	5	NaN
BPLF1	LQSLLVDDGGAAER	3.27e-05	135.57	1	NaN
BPLF1	DGGLGDLLSDSVLTYR	7.48e-19	198.87	1	NaN
BRRF1	ALCSWIISQDGMR	6.13e-07	153.32	1	NaN
BRRF2	VLTPDFHEIPDLDDSDAVFAR	4.55e-05	98.882	2	NaN
BRRF2	LWVDSCGCPECLQCLK	6.11e-06	124.25	1	NaN
BSLF2/BMLF1	GEVHGCTDESYGK	0.000935	113.76	4	NaN
BSLF2/BMLF1	DTWLDAR	0.000474	136.11	5	NaN
BSLF2/BMLF1	VVETLSSSYVK	0.000404	107.11	4	29.68
BSLF2/BMLF1	NYNPGTLSSLLTEAVETHTR	7.49e-23	190.1	9	55.736
BSLF2/BMLF1	DEDEKEETGNSSYTR	7.41e-46	260.08	4	NaN
BSRF1	YSQLPEEPETFECPDR	1.86e-13	184.22	1	NaN
BTRF1	LGNAPAAQVSNVLIANR	2.83e-06	124.84	1	NaN
BVRF2	LVQASASGVAQSK	1.02e-05	119.77	4	37.157
BVRF2	EDTNPQQPTTEGHHR	2.63e-35	241.41	9	NaN
BXLF1	TPDPFSWFR	0.00096	126.31	5	NaN
BXLF1	YWTHVYENAIK	0.000382	128.88	4	9.6829
BXLF1	LNVEENMR	0.000137	140.11	8	NaN
BXLF1	EDTSAEVLACQMK	4.84e-07	156	9	10.636
BXLF1	SQFFDWAGLSK	4.77e-07	143.55	7	38.587
BXLF1	PACSLFLEGAPGVGK	1.81e-08	146.84	2	NaN
BXLF1	TQAAVTSNTGNSPGSR	6.63e-36	249.54	5	NaN
BZLF1	TPDVLHEDLLNF	0.000624	119.03	3	NaN
BZLF1	KPQQPESLEECDSELEIKR	1.24e-07	143.23	1	NaN
BZLF1	KPQQPESLEECDSELEIK	1.58e-11	161.14	3	NaN

## Sheet: Supp Table 2
Identification of Epstein-Barr virus replication proteins in Burkitt’s lymphoma cells.
Supplementary Table 2. Peptides identified by mass spectrometry when searching only for EBV proteins
Mascot hit	MaxQuant hit number	Heavy IDs only?	Protein IDs	Majority protein IDs	Peptide counts (all)	Peptide counts (razor+unique)	Peptide counts (unique)	Fasta headers	Number of proteins	Peptides	Razor + unique peptides	Unique peptides	Sequence coverage [%]	Unique + razor sequence coverage [%]	Unique sequence coverage [%]	Mol. weight [kDa]	Sequence length	Sequence lengths	Q-value	Score	Ratio H/L	Ratio H/L normalized	Ratio H/L variability [%]	Ratio H/L count	Ratio H/L iso-count	Ratio H/L type	Intensity	Intensity L	Intensity H	Only identified by site	Reverse	Potential contaminant	id	Peptide IDs	Peptide is razor	Mod. peptide IDs	Evidence IDs	MS/MS IDs	Best MS/MS	Acetyl (K) site IDs	Oxidation (M) site IDs	Phospho (ST) site IDs	Acetyl (K) site positions	Oxidation (M) site positions	Phospho (ST) site positions
1	1		Q3KSN9;Q1HVB8;P03227	Q3KSN9;Q1HVB8;P03227	46;46;46	46;46;46	46;46;46	;;	3	46	46	46	43.4	43.4	43.4	123.03	1128	1128;1128;1128	0	323.31	37.576	58.362	68.485	42	0	Median	4956700000	102010000	4854700000				121	25;29;51;59;99;115;146;158;163;192;211;214;215;244;249;263;301;423;435;446;484;509;518;533;572;573;617;624;630;662;668;670;675;707;739;750;773;788;855;868;869;888;889;900;919;921	True;True;True;True;True;True;True;True;True;True;True;True;True;True;True;True;True;True;True;True;True;True;True;True;True;True;True;True;True;True;True;True;True;True;True;True;True;True;True;True;True;True;True;True;True;True	28;32;55;63;104;105;123;154;166;167;172;202;224;227;228;259;265;266;280;319;452;465;477;518;546;557;573;622;623;669;676;682;714;715;721;723;728;761;794;795;806;830;846;920;921;935;936;957;958;969;989;990;992	111;112;113;114;124;125;126;127;128;129;130;131;132;214;215;216;217;234;235;236;237;238;239;240;241;393;394;395;396;397;398;399;504;505;506;639;640;674;675;676;677;685;686;687;688;689;690;840;841;891;892;893;894;895;899;900;901;902;903;904;905;906;907;908;909;910;1163;1164;1165;1166;1167;1168;1187;1188;1189;1190;1191;1192;1193;1194;1195;1196;1197;1198;1199;1200;1237;1238;1239;1240;1331;1332;1333;…	156;157;158;159;160;161;171;172;173;174;175;176;177;178;179;180;181;182;276;277;278;279;280;299;300;301;302;303;304;305;306;307;497;498;499;500;501;502;503;504;505;506;507;640;641;642;820;821;822;867;868;869;870;883;884;885;886;887;888;889;890;1086;1087;1141;1142;1143;1144;1145;1149;1150;1151;1152;1153;1154;1155;1156;1157;1158;1159;1160;1469;1470;1471;1472;1473;1474;1475;1476;1477;1512;1513;1514;…	158;178;279;302;507;640;821;868;886;1087;1145;1156;1160;1474;1523;1582;1706;2579;3007;3222;3545;3638;3669;3811;4068;4072;4250;4299;4314;4443;4609;4865;4885;5182;5514;5548;5619;5670;6028;6050;6056;6130;6141;6164;6308;6318		86;87;88;89;90;91;92;93			213;452;480;578;581;714;756;939
2	2		P0C702;P03190;Q3KSU5	P0C702;P03190;Q3KSU5	31;31;28	31;31;28	31;31;28	;;	3	31	31	31	45.5	45.5	45.5	93.03	826	826;826;826	0	323.31	20.363	31.609	99.311	12	0	Median	848340000	15157000	833180000				106	2;12;19;28;50;52;60;63;68;98;145;153;168;253;272;312;390;417;455;512;531;542;623;638;717;747;752;878;879;885;925	True;True;True;True;True;True;True;True;True;True;True;True;True;True;True;True;True;True;True;True;True;True;True;True;True;True;True;True;True;True;True	2;3;15;22;31;54;56;64;67;73;103;153;161;177;270;289;290;331;416;445;486;549;571;584;585;675;690;771;772;803;808;945;946;954;996	5;6;31;32;33;34;35;36;77;78;117;118;119;120;121;122;123;209;210;211;212;213;218;219;220;221;242;243;244;248;249;250;251;263;264;265;266;267;268;390;391;392;637;638;664;665;704;705;1208;1258;1259;1260;1370;1371;1727;1728;1729;1730;1731;1968;2445;2734;2735;2857;2858;2883;2884;3249;3282;3283;3284;3285;3286;4052;4053;4054;4055;4126;4127;4128;4137;4138;4139;4570;4571;4572;4573;4574;4575;4576;4577;4578…	9;10;39;40;41;42;43;44;45;46;102;103;164;165;166;167;168;169;170;269;270;271;272;273;274;275;281;282;283;284;285;308;309;310;314;315;316;317;318;330;331;332;333;334;335;492;493;494;495;496;818;819;853;854;905;906;907;1538;1600;1601;1602;1748;1749;2221;2222;2223;2224;2225;2226;2227;2551;2552;3244;3652;3653;3805;3806;3807;3834;3835;4296;4339;4340;4341;4342;4343;5449;5450;5451;5452;5537;5538;5539;55…	10;44;103;167;271;284;310;316;333;494;818;853;906;1538;1602;1749;2224;2552;3244;3653;3806;3835;4296;4339;5451;5540;5550;6092;6101;6121;6329		53;54;55;56;57			68;238;349;679;738
3	3		Q1HVD1;P03177;Q3KSQ2	Q1HVD1;P03177;Q3KSQ2	19;19;17	19;19;17	19;19;17	;;	3	19	19	19	31.5	31.5	31.5	67.162	607	607;607;607	0	323.31	21.001	31.762	146.74	7	0	Median	459780000	9050800	450730000				98	167;176;216;262;278;332;350;397;487;583;598;716;730;746;780;789;797;843;924	True;True;True;True;True;True;True;True;True;True;True;True;True;True;True;True;True;True;True	176;185;186;229;279;296;353;371;423;521;522;634;650;770;785;802;838;847;848;856;908;995	703;797;798;799;800;801;802;803;911;912;913;1233;1234;1235;1236;1281;1416;1417;1418;1419;1642;1643;1739;2670;2671;2672;2673;2674;2675;3119;3120;3121;3173;3174;4049;4050;4051;4079;4080;4081;4082;4083;4084;4120;4121;4122;4123;4124;4125;4212;4213;4214;4240;4241;4242;4243;4244;4245;4246;4247;4248;4249;4250;4260;4481;4482;4483;4484;4485;4755;4756;4757;4758;4759	904;1039;1040;1041;1042;1043;1044;1045;1046;1047;1048;1161;1162;1163;1574;1575;1576;1577;1578;1641;1802;1803;1804;1805;2125;2126;2127;2238;3550;3551;3552;3553;3554;3555;3556;3557;3558;3559;3560;3561;4138;4139;4140;4207;4208;5446;5447;5448;5483;5484;5485;5486;5487;5488;5489;5528;5529;5530;5531;5532;5533;5534;5535;5536;5644;5645;5646;5647;5648;5679;5680;5681;5682;5683;5684;5685;5686;5687;5688;5689;…	904;1045;1163;1576;1641;1802;2125;2238;3552;4139;4208;5446;5486;5535;5646;5686;5699;5999;6325		45;46	35		356;443	97
4	4		Q3KSU3;P0C6Z0;P03191	Q3KSU3;P0C6Z0;P03191	24;24;24	24;24;24	24;24;24	;;	3	24	24	24	55.4	55.4	55.4	43.361	404	404;404;404	0	323.31	46.399	66.845	51.039	10	0	Median	1879000000	24422000	1854600000				107	34;104;183;297;351;375;496;514;515;538;563;603;607;608;610;618;648;671;676;701;783;784;873;874	True;True;True;True;True;True;True;True;True;True;True;True;True;True;True;True;True;True;True;True;True;True;True;True	37;110;193;315;372;373;400;531;532;551;552;553;554;578;579;611;612;613;655;659;660;662;670;700;724;729;755;841;842;940;941	141;142;405;406;407;408;409;410;411;822;823;824;825;826;827;1318;1319;1320;1321;1322;1323;1324;1325;1326;1327;1644;1645;1695;1696;1697;1698;1699;1700;1701;2685;2686;2687;2739;2740;2741;2742;2743;2744;2745;2868;2869;3035;3036;3037;3038;3039;3040;3041;3042;3043;3044;3045;3185;3190;3191;3192;3193;3194;3195;3196;3198;3212;3213;3314;3683;3684;3685;3686;3687;3688;3689;3690;3691;3692;3693;3701;3856;3857…	192;193;515;516;517;518;519;520;521;522;523;1068;1069;1070;1071;1072;1073;1682;1683;1684;1685;1686;1687;1688;1689;1690;1691;1692;1693;1694;1695;1696;1697;1698;1699;2128;2129;2183;2184;2185;2186;2187;2188;2189;3571;3572;3573;3657;3658;3659;3660;3661;3662;3663;3664;3665;3818;3819;3820;4034;4035;4036;4037;4038;4039;4040;4041;4042;4043;4044;4045;4046;4219;4227;4228;4229;4230;4231;4232;4233;4235;4252;…	192;521;1068;1697;2129;2188;3571;3661;3665;3819;4044;4219;4229;4233;4235;4252;4383;4876;4886;5165;5660;5661;6080;6087		58;59;60;61;62;63	36;37		1;130;146;149;161;168	333;335
5	5		P0C704;P0C703;P03226	P0C704;P0C703;P03226	31;31;31	31;31;31	31;31;31	;;	3	31	31	31	28.6	28.6	28.6	153.93	1381	1381;1381;1381	0	323.31	25.473	40.887	30.927	6	0	Median	283620000	6057000	277560000				120	18;43;64;94;120;134;135;139;283;284;290;306;310;330;337;384;416;436;448;451;479;500;544;556;682;683;800;802;867;882;897	True;True;True;True;True;True;True;True;True;True;True;True;True;True;True;True;True;True;True;True;True;True;True;True;True;True;True;True;True;True;True	21;46;68;99;128;142;143;147;301;302;308;324;329;351;358;410;444;466;479;482;512;513;536;537;587;602;603;736;737;860;862;934;949;966	74;75;76;163;164;252;385;554;555;614;615;616;617;618;622;1289;1290;1291;1301;1302;1343;1344;1345;1368;1413;1414;1429;1720;1721;1967;2272;2428;2429;2430;2434;2649;2650;2651;2693;2694;2886;2940;2941;3717;3718;4271;4272;4273;4274;4275;4279;4529;4581;4582;4583;4584;4585;4626	99;100;101;218;219;319;487;708;709;792;793;794;795;796;803;1652;1653;1654;1664;1665;1719;1720;1721;1746;1799;1800;1816;2213;2214;2215;2550;3008;3225;3226;3227;3231;3525;3526;3527;3528;3581;3582;3837;3902;3903;3904;3905;4906;4907;5710;5711;5712;5713;5714;5718;6049;6104;6105;6106;6107;6108;6156	101;218;319;487;708;792;796;803;1652;1654;1664;1719;1746;1799;1816;2214;2550;3008;3225;3231;3525;3582;3837;3904;4906;4907;5713;5718;6049;6106;6156		79;80;81;82;83;84;85	68		218;236;251;328;387;567;889	320
6	14		Q3KSP1;Q1HVC1;P03198	Q3KSP1;Q1HVC1;P03198	19;19;18	19;19;18	19;19;18	;;	3	19	19	19	21.1	21.1	21.1	113.43	1015	1015;1015;1015	0	121.9	NaN	NaN	NaN	1	0	Median	306300000	973570	305330000				137	93;190;228;365;381;408;418;440;466;513;633;693;710;758;835;844;848;851;922	True;True;True;True;True;True;True;True;True;True;True;True;True;True;True;True;True;True;True	98;200;243;387;407;435;446;471;498;550;685;747;764;815;899;909;913;916;993	382;383;384;838;948;949;950;951;952;953;954;1671;1713;1863;1969;1970;1971;1972;2288;2289;2618;2736;2737;2738;3270;3271;3272;3738;3739;3885;4168;4454;4455;4486;4493;4494;4495;4500;4501;4502;4753	484;485;486;1084;1210;1211;1212;1213;1214;1215;1216;1217;2156;2204;2400;2553;2554;2555;2556;2557;2558;2559;3026;3027;3028;3029;3030;3031;3032;3486;3654;3655;3656;4324;4325;4326;4930;4931;4932;4933;5193;5586;5957;5958;5959;6001;6008;6009;6010;6015;6016;6017;6018;6019;6320	484;1084;1213;2156;2204;2400;2556;3031;3486;3656;4325;4932;5193;5586;5957;6001;6009;6018;6320		105			960
7	12		P0CAP7;P0CAP6;P0C701	P0CAP7;P0CAP6;P0C701	12;12;12	12;12;12	12;12;12	;;	3	12	12	12	48	48	48	34.358	302	302;302;302	0	141.95	21.761	34.081	26.29	2	0	Median	240160000	1304200	238850000				126	4;5;71;114;124;131;282;307;369;626;756;812	True;True;True;True;True;True;True;True;True;True;True;True	5;6;7;8;76;121;122;132;139;300;325;326;392;678;813;875	8;9;10;11;12;13;14;15;16;17;18;271;272;273;274;275;502;503;563;564;580;1286;1287;1288;1346;1347;1348;1349;1350;1681;1682;3257;4145;4146;4343;4344	12;13;14;15;16;17;18;19;20;21;22;23;24;25;338;339;340;341;342;343;638;639;717;718;719;720;736;1647;1648;1649;1650;1651;1722;1723;1724;1725;1726;2167;2168;2169;4308;5560;5561;5805;5806	18;22;341;639;718;736;1648;1724;2169;4308;5561;5806		96;97;98;99;100			113;121;174;202;278
8	6		Q3KSV4;Q1HVJ0;P03179	Q3KSV4;Q1HVJ0;P03179	23;22;22	23;22;22	23;22;22	;;	3	23	23	23	21.2	21.2	21.2	142.8	1318	1318;1318;1318	0	323.31	3.4326	5.2311	207.89	2	0	Median	164270000	1881500	162390000				148	10;46;69;102;229;289;299;412;441;483;530;578;605;612;625;627;697;720;725;764;804;836;901	True;True;True;True;True;True;True;True;True;True;True;True;True;True;True;True;True;True;True;True;True;True;True	13;50;74;108;244;307;317;440;472;517;570;629;657;664;677;679;751;775;780;821;864;900;901;970	28;202;203;204;205;269;402;403;955;1300;1329;1959;1960;2290;2291;2663;2856;3075;3076;3077;3188;3202;3203;3256;3258;3748;3749;4062;4070;4180;4283;4284;4456;4457;4635	36;259;260;261;262;263;264;265;336;510;511;512;1218;1663;1701;2542;2543;3033;3034;3035;3543;3804;4078;4079;4080;4223;4239;4240;4241;4242;4307;4309;4942;4943;4944;5459;5460;5471;5606;5725;5726;5960;5961;6166	36;265;336;512;1218;1663;1701;2543;3034;3543;3804;4078;4223;4242;4307;4309;4944;5460;5471;5606;5726;5961;6166		110			962
9	13		Q3KSR5;Q1HVE7;P03217	Q3KSR5;Q1HVE7;P03217	17;16;16	17;16;16	17;16;16	;;	3	17	17	17	37.9	37.9	37.9	52.682	470	470;470;470	0	133.75	NaN	NaN	NaN	1	0	Median	194220000	55080000	139140000				143	147;239;315;389;449;454;476;570;615;672;686;722;803;834;863;871;923	True;True;True;True;True;True;True;True;True;True;True;True;True;True;True;True;True	155;254;335;336;415;480;485;509;620;667;725;740;777;863;898;930;938;994	641;980;981;1375;1376;1377;1378;1726;2431;2432;2440;2441;2442;2443;2444;2641;3062;3207;3694;3726;3727;3728;4064;4065;4066;4280;4281;4282;4453;4524;4525;4550;4551;4754	823;1248;1249;1755;1756;1757;1758;1759;2220;3228;3229;3239;3240;3241;3242;3243;3517;4065;4246;4879;4916;4917;4918;5462;5463;5464;5465;5466;5467;5719;5720;5721;5722;5723;5724;5955;5956;6044;6045;6071;6072;6073;6321	823;1249;1759;2220;3228;3240;3517;4065;4246;4879;4917;5467;5724;5956;6044;6073;6321		107;108	43;44		109;118	257;264
10	7		Q1HVI2;P03185	Q1HVI2;P03185	13;13	13;13	1;1	;	2	13	13	1	47.9	47.9	3.6	37.645	336	336;336	0	323.31	16.833	25.376	35.461	6	0	Median	236600000	4535400	232070000				102	79;92;103;206;321;335;558;584;696;726;798;829;861	True;True;True;True;True;True;True;True;True;True;True;True;True	84;97;109;217;342;356;605;635;636;750;781;857;858;893;927;928	302;378;379;380;381;404;859;860;861;1392;1393;1394;1423;1424;1425;1426;1427;2943;2944;3122;3123;3124;3125;3126;3127;3128;3129;3743;3744;3745;3746;3747;4071;4072;4073;4074;4075;4261;4262;4263;4264;4265;4266;4267;4268;4269;4438;4439;4440;4520;4521;4522	387;480;481;482;483;513;514;1106;1107;1108;1775;1776;1777;1809;1810;1811;1812;1813;3907;3908;4141;4142;4143;4144;4145;4146;4147;4148;4149;4937;4938;4939;4940;4941;5472;5473;5474;5475;5476;5477;5478;5700;5701;5702;5703;5704;5705;5706;5707;5708;5936;5937;5938;6040;6041;6042	387;480;514;1106;1775;1813;3908;4143;4941;5472;5707;5938;6042		47;48;49;50;51			125;164;181;183;187
11	11		Q1HVF0;Q8AZJ7;P30118;Q04343	Q1HVF0;Q8AZJ7;P30118	13;12;10;2	13;12;10;2	13;12;10;2	;;	4	13	13	13	22.7	22.7	22.7	78.225	709	709;723;522;201	0	279.58	NaN	NaN	NaN	0	0	Median	125700000	1781600	123920000				138	42;132;178;268;277;280;319;345;501;537;694;704;881	True;True;True;True;True;True;True;True;True;True;True;True;True	45;140;188;285;295;298;340;366;538;577;748;758;948	160;161;162;581;582;806;807;808;809;1246;1247;1248;1277;1278;1279;1280;1283;1386;1387;1388;1389;1635;1636;2695;2867;3740;3741;3862;3863;3864;3865;4580	214;215;216;217;737;738;1051;1052;1053;1054;1588;1589;1590;1634;1635;1636;1637;1638;1639;1640;1643;1768;1769;1770;1771;1772;2116;2117;2118;3583;3817;4934;4935;5170;5171;5172;5173;6103	217;737;1054;1588;1639;1643;1770;2116;3583;3817;4934;5172;6103		106			2
12	10		Q3KSU1;Q1HVH2;Q04360	Q3KSU1;Q1HVH2;Q04360	13;13;13	13;13;13	13;13;13	;;	3	13	13	13	29	29	29	53.481	479	479;479;479	0	286.54	36.532	53.145	35.964	4	0	Median	258290000	2838300	255450000				136	119;156;162;182;286;331;460;594;639;647;723;744;887	True;True;True;True;True;True;True;True;True;True;True;True;True	127;164;171;192;304;352;492;646;691;699;778;800;956	550;551;552;553;670;683;684;818;819;820;821;1293;1294;1295;1296;1415;2567;2568;3149;3150;3151;3152;3153;3154;3155;3156;3157;3287;3288;3289;3290;3313;4067;4117;4118;4598;4599;4600	704;705;706;707;859;860;861;862;863;879;880;881;882;1064;1065;1066;1067;1656;1657;1658;1659;1801;3413;3414;4173;4174;4175;4176;4177;4178;4179;4180;4181;4182;4183;4184;4185;4186;4187;4188;4189;4344;4345;4346;4347;4381;4382;5468;5525;5526;6123;6124;6125	704;862;882;1065;1659;1801;3413;4180;4346;4382;5468;5525;6123
13	8		P13288;P0C731;P0C6Z8	P13288;P0C731;P0C6Z8	12;12;12	12;12;12	12;12;12	;;	3	12	12	12	35.4	35.4	35.4	48.351	429	429;429;429	0	323.31	29.407	44.024	41.558	3	0	Median	289170000	2442400	286730000				124	87;113;157;193;203;276;324;376;519;685;884;886	True;True;True;True;True;True;True;True;True;True;True;True	92;120;165;203;214;294;345;401;402;558;739;952;953;955	369;370;371;500;501;671;672;673;842;856;1275;1276;1399;1400;1401;1402;1403;1404;1702;1703;1704;1705;1706;2750;2751;2752;2753;3720;3721;3722;3723;3724;3725;4592;4593;4594;4597	470;471;472;473;636;637;864;865;866;1088;1103;1632;1633;1782;1783;1784;1785;1786;1787;2190;2191;2192;2193;2194;3670;3671;3672;3673;4909;4910;4911;4912;4913;4914;4915;6117;6118;6119;6122	472;637;865;1088;1103;1632;1782;2192;3673;4909;6118;6122		94;95			58;326
14	24		Q3KSQ6;Q1HVD6;P25214	Q3KSQ6;Q1HVD6;P25214	4;4;4	4;4;4	4;4;4	;;	3	4	4	4	13	13	13	33.624	301	301;301;301	0	38.739	47.398	71.779	26.976	2	0	Median	113050000	2637300	110420000				134	359;371;534;891	True;True;True;True	381;395;574;960	1655;1656;1657;1658;1659;1660;1661;1687;1688;1689;2864;4617	2139;2140;2141;2142;2143;2144;2145;2146;2175;2176;2177;3814;6145	2144;2175;3814;6145
15	16		P0C763;P0C762;P03188	P0C763;P0C762;P03188	6;6;6	6;6;6	6;6;6	;;	3	6	6	6	7.7	7.7	7.7	95.608	857	857;857;857	0	116.74	NaN	NaN	NaN	0	0	Median	43155000	0	43155000				105	62;123;224;245;257;819	True;True;True;True;True;True	66;131;237;260;274;883	246;247;562;938;939;1169;1214;1215;4421;4422	312;313;716;1197;1198;1478;1544;1545;5917;5918	313;716;1198;1478;1544;5917			66			153
16	9		Q3KSP9;Q1HVC7;P03234;Q66541;Q3KSP9-2;Q3KSP8;Q1HVC7-2;Q1HVC6;P03234-2	Q3KSP9;Q1HVC7;P03234;Q66541;Q3KSP9-2;Q3KSP8;Q1HVC7-2;Q1HVC6;P03234-2	9;9;9;8;8;8;8;8;8	9;9;9;8;8;8;8;8;8	9;9;9;8;8;8;8;8;8	;;;;;;;;	9	9	9	9	17.9	17.9	17.9	64.117	605	605;605;605;345;345;345;345;345;345	0	323.31	20.906	31.575	198.54	3	0	Median	183140000	2936200	180210000				123	13;31;142;175;521;586;661;702;749	True;True;True;True;True;True;True;True;True	16;34;150;184;560;638;713;756;805	37;134;627;628;629;785;786;787;788;789;790;791;792;793;794;795;796;2835;2836;2837;3131;3132;3359;3360;3859;4130;4131;4132;4133;4134	47;184;808;809;810;1027;1028;1029;1030;1031;1032;1033;1034;1035;1036;1037;1038;3779;3780;3781;3782;4151;4152;4440;4441;5167;5542;5543;5544;5545;5546;5547	47;184;809;1036;3780;4151;4441;5167;5544
17	25		P0C736;P0C6Z1;P03182	P0C736;P0C6Z1;P03182	5;5;5	5;5;5	5;5;5	;;	3	5	5	5	34.6	34.6	34.6	21.879	191	191;191;191	0	31.722	NaN	NaN	NaN	0	0	Median	311610000	0	311610000				100	505;582;772;839;909	True;True;True;True;True	542;633;829;904;978	2700;2701;3114;3115;3116;3117;3118;4189;4465;4466;4467;4468;4469;4470;4471;4472;4473;4648;4649;4650;4651;4652;4653;4654	3588;3589;4133;4134;4135;4136;4137;5617;5971;5972;5973;5974;5975;5976;5977;5978;5979;5980;5981;6181;6182;6183;6184;6185;6186;6187;6188;6189;6190	3589;4135;5617;5971;6181
18	18		Q3KST7;Q07275;P03195	Q3KST7;Q07275;P03195	10;10;10	10;10;10	10;10;10	;;	3	10	10	10	36.7	36.7	36.7	30.892	278	278;278;278	0	75.741	NaN	NaN	NaN	0	0	Median	59715000	0	59715000				110	232;456;474;536;614;616;695;796;899;916	True;True;True;True;True;True;True;True;True;True	247;487;506;507;576;666;668;749;855;968;986	959;2446;2636;2637;2638;2639;2866;3206;3208;3742;4259;4628;4732	1222;3245;3510;3511;3512;3513;3514;3515;3816;4245;4247;4248;4936;5698;6158;6294	1222;3245;3513;3816;4245;4247;4936;5698;6158;6294		66;67;68;69	38		1;39;116;176	22
19	17		Q3KSU9;Q1HVI0;Q777G5;P14348	Q3KSU9;Q1HVI0;Q777G5;P14348	4;4;3;3	4;4;3;3	4;4;3;3	;;;	4	4	4	4	39.2	39.2	39.2	18.138	176	176;176;176;176	0	101.96	NaN	NaN	NaN	1	0	Median	106720000	1250700	105470000				141	6;251;433;490	True;True;True;True	9;268;463;525	19;20;1203;1204;1205;1206;2269;2679	26;27;1533;1534;1535;1536;3005;3565	26;1533;3005;3565
20	15		P0C717;P03197;Q3KST5	P0C717;P03197;Q3KST5	6;6;5	6;6;5	6;6;5	;;	3	6	6	6	49.4	49.4	49.4	17.687	162	162;162;162	0	121.63	NaN	NaN	NaN	0	0	Median	39964000	0	39964000				112	72;219;288;314;380;562	True;True;True;True;True;True	77;232;306;333;334;406;609;610	276;919;1299;1373;1374;1712;3033;3034	344;1170;1662;1751;1752;1753;1754;2203;4032;4033	344;1170;1662;1752;2203;4033		70;71;72;73;74	39		17;19;22;104;119	127
21	28		P0CK48;P0CK47	P0CK48;P0CK47	4;4	4;4	4;4	;	2	4	4	4	19.2	19.2	19.2	35.36	318	318;318	0	25.87	NaN	NaN	NaN	1	0	Median	23517000	731140	22785000				129	74;650;731;760	True;True;True;True	79;702;786;817	286;3316;4085;4176	358;4385;5490;5491;5492;5597;5598	358;4385;5491;5598
22	21		Q777D9;Q3KSS2;Q1HVF5;P12888	Q777D9;Q3KSS2;Q1HVF5;P12888	8;8;8;8	8;8;8;8	8;8;8;8	;;;	4	8	8	8	31	31	31	28.605	255	255;255;255;255	0	56.804	NaN	NaN	NaN	0	0	Median	67282000	0	67282000				133	8;231;305;341;398;415;566;790	True;True;True;True;True;True;True;True	11;246;323;362;424;443;616;849	23;958;1342;1519;1740;1966;3049;3050;3051;4251	31;1221;1718;1946;2239;2549;4051;4052;4053;5690	31;1221;1718;1946;2239;2549;4052;5690		102;103;104			70;72;188
23	34		Q777C5;Q3KSQ8;Q1HVD8;P03224	Q777C5;Q3KSQ8;Q1HVD8;P03224	2;2;2;2	2;2;2;2	2;2;2;2	;;;	4	2	2	2	11.5	11.5	11.5	23.791	234	234;234;234;234	0	2.3315	NaN	NaN	NaN	0	0	Median	7210100	0	7210100				119	567;795	True;True	617;854	3052;3053;4258	4054;4055;5697	4055;5697
27	20		P03206	P03206	7	7	3		1	7	7	3	33.9	33.9	10.6	26.86	245	245	0	60.184	NaN	NaN	NaN	0	0	Median	17239000	0	17239000				116	261;402;403;546;641;643;781	True;True;True;True;True;True;True	278;428;429;589;693;695;839	1232;1744;1745;1746;2888;3293;3295;4215;4216;4217;4218;4219	1573;2244;2245;2246;2247;3839;4350;4351;4353;5649;5650;5651;5652;5653	1573;2246;2247;3839;4351;4353;5650		75;76;77			1;2;221
28	26		P0C723;P0C722;P03207	P0C723;P0C722;P03207	6;6;6	6;6;6	6;6;6	;;	3	6	6	6	18.1	18.1	18.1	35.319	310	310;310;310	0	30.828	NaN	NaN	NaN	1	0	Median	13836000	267020	13569000				117	37;125;304;352;526;856	True;True;True;True;True;True	40;133;322;374;566;922	150;565;566;567;1341;1646;1647;2852;4512	201;721;722;723;1716;1717;2130;2131;3800;6032	201;721;1716;2131;3800;6032		78	40		256	305
29	27		Q1HVI4;P03184	Q1HVI4;P03184	4;4	4;4	4;4	;	2	4	4	4	8.4	8.4	8.4	57.91	525	525;525	0	28.603	NaN	NaN	NaN	0	0	Median	10683000	0	10683000				101	388;703;714;799	True;True;True;True	414;757;768;859	1725;3860;3861;4044;4270	2219;5168;5169;5437;5709	2219;5168;5437;5709
31	40		Q777F5;Q1HVH1;P03193	Q777F5;Q1HVH1;P03193	4;4;4	4;4;4	1;1;1	;;	3	4	4	1	4.3	4.3	0.9	98.04	874	874;874;874	0.009434	0.46097	NaN	NaN	NaN	1	0	Median	20919000	19263000	1656300				109	15;218;551;766	True;True;True;True	18;231;596;823	40;41;42;918;2930;4183	50;51;52;53;1169;3891;5609	53;1169;3891;5609		64;65			1;533
32	35		Q3KSQ3;Q1HVD2;P03231	Q3KSQ3;Q1HVD2;P03231	4;4;4	4;4;4	4;4;4	;;	3	4	4	4	5.1	5.1	5.1	78.365	706	706;706;706	0	1.9249	NaN	NaN	NaN	0	0	Median	12309000	0	12309000				122	77;137;422;866	True;True;True;True	82;145;451;933	289;620;1986;4528	361;362;798;799;800;2574;2575;6048	362;798;2574;6048
33	29		Q3KSR8;P29882;P0C6Z9	Q3KSR8;P29882;P0C6Z9	2;2;2	2;2;2	2;2;2	;;	3	2	2	2	9.4	9.4	9.4	31.272	278	278;278;278	0	21.666	NaN	NaN	NaN	0	0	Median	1462700	0	1462700				125	101;136	True;True	107;144	401;619	509;797	509;797
34	30		P0CK55;P0CK54;P0CK53	P0CK55;P0CK54;P0CK53	4;4;4	4;4;4	4;4;4	;;	3	4	4	4	17.3	17.3	17.3	36.888	336	336;336;336	0	13.196	NaN	NaN	NaN	0	0	Median	18514000	0	18514000				131	254;311;801;857	True;True;True;True	271;330;861;923	1209;1369;4276;4277;4278;4513;4514	1539;1747;5715;5716;5717;6033;6034	1539;1747;5716;6034
35	31		Q1HVD3;P30119;P0C734	Q1HVD3;P30119;P0C734	3;3;3	3;3;3	3;3;3	;;	3	3	3	3	10.9	10.9	10.9	44.313	404	404;404;404	0	7.3106	NaN	NaN	NaN	1	0	Median	8983400	4540400	4442900				128	396;447;467	True;True;True	422;478;499	1738;2427;2619	2237;3224;3487	2237;3224;3487			69			390
36	32		Q3KSU6;Q1HVH7;P03187	Q3KSU6;Q1HVH7;P03187	4;4;4	4;4;4	4;4;4	;;	3	4	4	4	12.6	12.6	12.6	39.118	364	364;364;364	0	5.2894	NaN	NaN	NaN	0	0	Median	13427000	0	13427000				104	238;260;386;391	True;True;True;True	253;277;412;417	979;1231;1723;1732	1247;1571;1572;2217;2228;2229;2230	1247;1572;2217;2230		52			302
37	36		Q3KST4-2;P68343-2;P03200-2;Q3KST4;P68343;P03200	Q3KST4-2;P68343-2;P03200-2;Q3KST4;P68343;P03200	1;1;1;1;1;1	1;1;1;1;1;1	1;1;1;1;1;1	;;;;;	6	1	1	1	3	3	3	70.016	658	658;658;658;856;886;907	0	1.8139	NaN	NaN	NaN	0	0	Median	0	0	0				113	574	TRUE	624	3070	4073	4073
38	39		Q3KSR6	Q3KSR6	1	1	1		1	1	1	1	10.7	10.7	10.7	8.4982	75	75	0	0.88728	NaN	NaN	NaN	0	0	Median	6788400	0	6788400				144	453	TRUE	484	2439	3237;3238	3237
39	37		P0C6Z5;P03205;Q1HVG2	P0C6Z5;P03205;Q1HVG2	2;2;1	2;2;1	2;2;1	;;	3	2	2	2	10.3	10.3	10.3	25.257	223	223;223;223	0	1.4823	NaN	NaN	NaN	0	0	Median	20999000	0	20999000				115	601;754	True;True	653;810	3182;4141;4142	4216;5554;5555	4216;5555
40	33		Q3KSU2;Q1HVH3;P03192	Q3KSU2;Q1HVH3;P03192	1;1;1	1;1;1	1;1;1	;;	3	1	1	1	2.8	2.8	2.8	39.549	357	357;357;357	0	2.5518	NaN	NaN	NaN	0	0	Median	8929200	0	8929200				108	581	TRUE	632	3113	4132	4132
41	43		Q777D7;Q3KSS0;Q1HVF3;P03214	Q777D7;Q3KSS0;Q1HVF3;P03214	2;2;2;2	2;2;2;2	2;2;2;2	;;;	4	2	2	2	3.2	3.2	3.2	89.852	809	809;809;809;809	1	-2	NaN	NaN	NaN	0	0	Median	0	0	0	+			118	718;740	True;True	773;796	4056;4111	5453;5519	5453;5519			41			716
24, 30	23		Q3KSS5;P03210;Q1HVF8	Q3KSS5;P03210;Q1HVF8	9;7;5	9;7;5	9;7;5	;;	3	9	9	9	23.1	23.1	23.1	56.875	537	537;537;537	0	39.833	NaN	NaN	NaN	0	0	Median	25782000	0	25782000				145	33;152;195;296;300;528;593;711;859	True;True;True;True;True;True;True;True;True	36;160;205;314;318;568;645;765;925	140;663;845;1317;1330;2854;3147;3148;3886;4517;4518	191;852;1091;1681;1702;3802;4170;4171;4172;5194;6037;6038	191;852;1091;1681;1702;3802;4172;5194;6037
25, 26	19		P03186;Q1HVH9;Q3KSU8	P03186;Q1HVH9;Q3KSU8	10;9;9	10;9;9	10;9;9	;;	3	10	10	10	3.9	3.9	3.9	337.96	3149	3149;3154;3176	0	61.122	0.83766	1.252	15.943	10	0	Median	612060000	328460000	283600000				103	122;354;406;475;491;579;640;642;666;828	True;True;True;True;True;True;True;True;True;True	130;376;433;508;526;630;692;694;719;892	561;1649;1861;2640;2680;3078;3079;3080;3081;3082;3083;3084;3085;3086;3087;3088;3089;3090;3091;3092;3093;3094;3095;3096;3097;3098;3099;3100;3101;3102;3103;3104;3105;3106;3107;3108;3109;3110;3111;3291;3292;3294;3480;4437	715;2133;2398;3516;3566;4081;4082;4083;4084;4085;4086;4087;4088;4089;4090;4091;4092;4093;4094;4095;4096;4097;4098;4099;4100;4101;4102;4103;4104;4105;4106;4107;4108;4109;4110;4111;4112;4113;4114;4115;4116;4117;4118;4119;4120;4121;4122;4123;4124;4125;4126;4127;4128;4129;4130;4348;4349;4352;4605;5935	715;2133;2398;3516;3566;4120;4349;4352;4605;5935
New hit	22	YES	P0CK62;P0CK50;P0CK49	P0CK62;P0CK50;P0CK49	1;1;1	1;1;1	1;1;1	;;	3	1	1	1	7.3	7.3	7.3	23.861	218	218;218;218	0	51.177	NaN	NaN	NaN	0	0	Median	1556400	0	1556400				130	918	TRUE	988	4734	6296	6296
New hit	38	YES	Q1HVB7;P0CK59;P0CK58	Q1HVB7;P0CK59;P0CK58	1;1;1	1;1;1	1;1;1	;;	3	1	1	1	6	6	6	20.917	182	182;220;220	0	1.4817	NaN	NaN	NaN	0	0	Median	690000	0	690000				132	138	TRUE	146	621	801;802	802
New hit	41	YES- but highly similar to hit number 10 (Q1HVI2;P03185)	Q3KSV1	Q3KSV1	13	1	1		1	13	1	1	48.8	4.5	4.5	37.589	336	336	0.0090909	0.34844	NaN	NaN	NaN	0	0	Median	5682000	0	5682000				147	79;92;103;206;321;558;584;613;696;726;798;829;861	False;False;False;False;False;False;False;True;False;False;False;False;False	84;97;109;217;342;605;635;636;665;750;781;857;858;893;927;928	302;378;379;380;381;404;859;860;861;1392;1393;1394;2943;2944;3122;3123;3124;3125;3126;3127;3128;3129;3204;3205;3743;3744;3745;3746;3747;4071;4072;4073;4074;4075;4261;4262;4263;4264;4265;4266;4267;4268;4269;4438;4439;4440;4520;4521;4522	387;480;481;482;483;513;514;1106;1107;1108;1775;1776;1777;3907;3908;4141;4142;4143;4144;4145;4146;4147;4148;4149;4243;4244;4937;4938;4939;4940;4941;5472;5473;5474;5475;5476;5477;5478;5700;5701;5702;5703;5704;5705;5706;5707;5708;5936;5937;5938;6040;6041;6042	387;480;514;1106;1775;3908;4143;4244;4941;5472;5707;5938;6042		47;48;49;50;51			125;164;181;183;187

## Sheet: supp table 3
Identification of Epstein-Barr virus replication proteins in Burkitt’s lymphoma cells.
Supplementary Table 3. Evidence for post-translational modifications of EBV proteins
protein name	gene name	prot_score	prot_mass	prot_matches	prot_matches_sig	prot_sequences	prot_sequences_sig	pep_query	pep_rank	pep_isbold	pep_isunique	pep_exp_mz	pep_exp_mr	pep_exp_z	pep_calc_mr	pep_delta	pep_miss	pep_score	pep_expect	pep_res_before	pep_seq	pep_res_after	pep_var_mod	pep_var_mod_pos
Ribonucleoside-diphosphate reductase large subunit	BORF2	2608	94915	105	105	27	27	80912	1	1	1	749.401	1496.79	2	1496.78	0.0098	0	56.12	2.4e-06	M	ATTSHVEHELLSK	L	Acetyl (Protein N-term); Label:2H(4) (K)	1.0000000000005.0
Thymidine kinase	BXLF1	2289	68283	75	75	14	14	94517	1	1	1	817.374	1632.73	2	1632.72	0.0125	0	112.97	5e-12	R	TQAAVTSNTGNSPGSR	H	Phospho (ST); Label:13C(6) (R)	0.0000000000030006.0
DNA polymerase processivity factor	BMRF1	2140	43689	77	77	17	17	93182	1	1	1	809.865	1617.72	2	1617.7	0.0109	0	54.34	3.7e-06	R	HTVSPSPSPPPPPR	T	2 Phospho (ST); Label:13C(6) (R)	0.00030003000006.0
DNA polymerase processivity factor	BMRF2	2140	43689	77	77	17	17	23475	1	1	1	514.267	1026.52	2	1026.51	0.0085	0	40.38	9.2e-05	-	METTQTLR	F	Acetyl (Protein N-term); Label:13C(6) (R)	1.00000006.0
DNA polymerase catalytic subunit	BALF5	1075	115014	57	57	19	19	97163	1	1	1	831.461	1660.91	2	1660.9	0.0103	0	32.98	0.0005	M	SGGLFYNPFLRPNK	G	Acetyl (Protein N-term); Label:2H(4) (K); Label:13C(6) (R)	1.00000000006005.0
Deoxyuridine 5-triphosphate nucleotidohydrolase	BLLF3	275	31264	10	10	6	6	28765	1	1	1	539.253	1076.49	2	1076.48	0.0073	0	30.32	0.00093	-	MEACPHIR	Y	Acetyl (Protein N-term); Oxidation (M); Label:13C(6) (R)	1.20000006.0
Tegument protein	BLRF2	206	17733	7	7	4	4	60505	1	1	1	665.824	1329.63	2	1329.62	0.0114	0	34.07	0.00039	K	GQPSPGEGTRPR	E	Phospho (ST); 2 Label:13C(6) (R)	0.000300000606.0
Trans-activator protein BZLF1	BZLF1	109	27237	8	8	4	4	72873	1	1	1	716.304	1430.59	2	1430.58	0.0101	0	31.25	0.00075	-	MMDPNSTSEDVK	F	Acetyl (Protein N-term); 2 Oxidation (M); Label:2H(4) (K)	1.220000000005.0
Capsid protein	BORF1	53	39352	6	6	5	5	9350	1	1	1	425.74	849.466	2	849.462	0.0035	1	16.61	0.022	R	RLNISR	G	Phospho (ST); 2 Label:13C(6) (R)	0.600036.0
